# Supplementary material for: Pilot Study on Acute Effects of Pharmacological Intraperitoneal L-Homoarginine on Homeostasis of Lysine and Other Amino Acids in a Rat Model of Isoprenaline-Induced Takotsubo Cardiomyopathy
Source: MDPI journal article supplement (doi:10.3390/ijms23094734), 2022-04-25
Supplement: s1 [file s1]

## Supplement

### **Pilot study on acute effects of pharmacological intraperitoneal L-homoarginine on homeostasis of lysine and other amino acids in a rat model of isoprenaline-induced takotsubo cardiomyopathy**

**Dimitrios Tsikas <sup>1,\*</sup> and Björn Redfors <sup>2</sup>**

<sup>1</sup> Institute of Toxicology, Core Unit Proteomics, Hannover Medical School, Hannover 30623, Germany

<sup>2</sup> Department of Cardiology, Sahlgrenska University Hospital, Gothenburg, Sweden

Table S1. Concentrations (in  $\mu\text{M}$ ) of free amino acids in the homogenates of the analyzed organs of the rats. See Table 1.

| Rat/Organ         | Ala  | Thr  | Gly  | Val  | Ser  | Sarc | Leu+Ile | GAA  | Asp+Asn | OH-Pro | Pro  | Met  | Glu+Gln | Orn+Cit | Phe   | Tyr  | Lys         | Arg         | hArg        | Trp  | ADMA |
|-------------------|------|------|------|------|------|------|---------|------|---------|--------|------|------|---------|---------|-------|------|-------------|-------------|-------------|------|------|
| <b>R1 Lung</b>    | 707  | 191  | 835  | 97.2 | 473  | 13.5 | 187     | 1.00 | 247     | 10.0   | 128  | 98.2 | 941     | 49.6    | 72.1  | 71.5 | <b>229</b>  | <b>102</b>  | <b>186</b>  | 167  | 2.44 |
| <b>R1 Kidney</b>  | 1232 | 824  | 834  | 710  | 913  | 10.2 | 863     | 44.6 | 871     | 15.8   | 509  | 145  | 1496    | 125     | 243   | 237  | <b>646</b>  | <b>365</b>  | <b>444</b>  | 188  | 1.21 |
| <b>R2 Heart</b>   | 1159 | 838  | 817  | 701  | 955  | 10.2 | 944     | 59.6 | 867     | 19.2   | 559  | 146  | 1521    | 119     | 254   | 264  | <b>644</b>  | <b>384</b>  | <b>9.67</b> | 145  | 1.33 |
| <b>R2 Lung</b>    | 743  | 345  | 873  | 219  | 594  | 11.1 | 330     | 1.07 | 363     | 16.6   | 211  | 119  | 1125    | 39.3    | 132.2 | 98.5 | <b>306</b>  | <b>210</b>  | <b>5.13</b> | 165  | 3.65 |
| <b>R2 Kidney</b>  | 481  | 63   | 197  | 43.5 | 160  | 6.38 | 96.9    | 0.88 | 215     | 9.79   | 54.9 | 88.4 | 815     | 26.2    | 41.6  | 43.8 | <b>96</b>   | <b>37.4</b> | <b>9.68</b> | 145  | 0.44 |
| <b>R2 Liver</b>   | 737  | 276  | 745  | 161  | 499  | 11.8 | 278     | 0.99 | 347     | 14.3   | 171  | 121  | 1103    | 86.7    | 111   | 121  | <b>241</b>  | <b>124</b>  | <b>6.32</b> | 160  | 3.31 |
| <b>R3 Heart</b>   | 1605 | 1171 | 1190 | 957  | 1201 | 9.14 | 1439    | 60.5 | 1409    | 34.2   | 829  | 249  | 2404    | 157     | 407   | 329  | <b>834</b>  | <b>575</b>  | <b>7.55</b> | 141  | 2.01 |
| <b>R3 Lung</b>    | 533  | 216  | 297  | 123  | 312  | 16.9 | 199     | 1.03 | 157     | 5.24   | 82.8 | 69.9 | 442     | 113     | 64.0  | 79.8 | <b>191</b>  | <b>7.34</b> | <b>3.82</b> | 142  | 1.03 |
| <b>R3 Kidney</b>  | 594  | 197  | 235  | 111  | 339  | 15.1 | 266     | 0.67 | 322     | 7.85   | 85.5 | 101  | 897     | 77.7    | 128   | 127  | <b>173</b>  | <b>60.7</b> | <b>8.12</b> | 113  | 0.94 |
| <b>R3 Liver</b>   | 893  | 535  | 638  | 336  | 814  | 30.8 | 543     | 0.72 | 393     | 6.53   | 243  | 147  | 1270    | 267     | 169   | 139  | <b>392</b>  | <b>14.3</b> | <b>15.5</b> | 56.0 | 2.65 |
| <b>R4 Lung</b>    | 1005 | 517  | 928  | 253  | 707  | 10.4 | 401     | 1.56 | 523     | 19.4   | 285  | 188  | 1696    | 144     | 184   | 197  | <b>441</b>  | <b>185</b>  | <b>194</b>  | 162  | 5.25 |
| <b>R4 Kidney</b>  | 749  | 196  | 377  | 94   | 394  | 9.82 | 198     | 2.36 | 339     | 17.0   | 110  | 183  | 1723    | 62.9    | 82.4  | 72.2 | <b>187</b>  | <b>73.8</b> | <b>255</b>  | 101  | 0.80 |
| <b>R4 Liver</b>   | 1611 | 566  | 848  | 292  | 682  | 17.1 | 425     | 3.13 | 392     | 15.3   | 266  | 123  | 1110    | 351     | 160   | 140  | <b>714</b>  | <b>10.3</b> | <b>425</b>  | 103  | 3.15 |
| <b>R5 Lung</b>    | 851  | 362  | 990  | 229  | 622  | 9.94 | 365     | 0.91 | 389     | 15.0   | 225  | 136  | 1152    | 87      | 150   | 137  | <b>313</b>  | <b>181</b>  | <b>0.64</b> | 146  | 4.39 |
| <b>R5 Liver</b>   | 1436 | 522  | 744  | 291  | 701  | 29.7 | 453     | 3.25 | 428     | 14.2   | 256  | 127  | 1085    | 305     | 161   | 158  | <b>433</b>  | <b>9.6</b>  | <b>0.62</b> | 85.1 | 3.14 |
| <b>R13 Heart</b>  | 674  | 188  | 321  | 93   | 351  | 12.6 | 208     | 1.02 | 223     | 10.7   | 102  | 150  | 1298    | 55.3    | 83.0  | 68.5 | <b>151</b>  | <b>75.4</b> | <b>20.3</b> | 107  | 0.63 |
| <b>R13 Lung</b>   | 1113 | 645  | 1548 | 336  | 858  | 18.1 | 518     | 1.96 | 588     | 23.3   | 358  | 222  | 2049    | 139     | 208   | 173  | <b>471</b>  | <b>261</b>  | <b>15.9</b> | 134  | 5.74 |
| <b>R13 Kidney</b> | 1333 | 821  | 993  | 651  | 937  | 12.1 | 812     | 39.7 | 856     | 22.8   | 574  | 168  | 1403    | 105     | 250   | 173  | <b>602</b>  | <b>370</b>  | <b>15.1</b> | 153  | 1.72 |
| <b>R13 Liver</b>  | 1631 | 680  | 952  | 353  | 906  | 20.1 | 601     | 1.38 | 455     | 12.4   | 306  | 141  | 1388    | 358     | 226   | 149  | <b>492</b>  | <b>21.2</b> | <b>22.1</b> | 109  | 4.29 |
| <b>R14 Heart</b>  | 683  | 159  | 389  | 316  | 306  | 21.7 | 181     | 1.93 | 389     | 10.8   | 73.1 | 196  | 1640    | 36.8    | 75.8  | 63.0 | <b>154</b>  | <b>91.2</b> | <b>143</b>  | 115  | 0.84 |
| <b>R14 Lung</b>   | 597  | 280  | 1020 | 140  | 512  | 14.0 | 244     | 1.94 | 440     | 15.3   | 159  | 132  | 1132    | 27.0    | 91.7  | 72.6 | <b>245</b>  | <b>171</b>  | <b>52.2</b> | 121  | 2.62 |
| <b>R14 Kidney</b> | 2900 | 1730 | 2074 | 1368 | 1564 | 21.0 | 2011    | 92.7 | 2119    | 76.4   | 1375 | 360  | 3445    | 216     | 567   | 568  | <b>1101</b> | <b>733</b>  | <b>220</b>  | 168  | 3.10 |
| <b>R14 Liver</b>  | 954  | 503  | 883  | 287  | 740  | 33.5 | 473     | 0.62 | 388     | 4.59   | 198  | 106  | 1205    | 243     | 171   | 159  | <b>391</b>  | <b>15.9</b> | <b>132</b>  | 142  | 2.91 |

|                   |      |      |      |      |      |       |      |      |      |      |      |     |      |      |      |      |             |             |             |      |      |
|-------------------|------|------|------|------|------|-------|------|------|------|------|------|-----|------|------|------|------|-------------|-------------|-------------|------|------|
| <b>R17 Heart</b>  | 740  | 140  | 363  | 86   | 334  | 14.2  | 191  | 0.86 | 324  | 9.02 | 85.3 | 148 | 1234 | 33.1 | 72.7 | 86.3 | <b>140</b>  | <b>92.0</b> | <b>127</b>  | 131  | 1.05 |
| <b>R17 Lung</b>   | 980  | 315  | 1242 | 243  | 579  | 5.60  | 346  | 1.58 | 465  | 20.8 | 255  | 146 | 1654 | 75.9 | 125  | 116  | <b>386</b>  | <b>230</b>  | <b>199</b>  | 21.9 | 4.47 |
| <b>R17 Kidney</b> | 2910 | 1759 | 1975 | 1529 | 1615 | 14.2  | 2167 | 97.8 | 2194 | 37.9 | 1433 | 348 | 3576 | 254  | 619  | 639  | <b>1138</b> | <b>767</b>  | <b>416</b>  | 172  | 2.90 |
| <b>R17 Liver</b>  | 1659 | 619  | 848  | 348  | 872  | 18.4  | 618  | 0.63 | 480  | 9.13 | 303  | 126 | 1398 | 320  | 139  | 163  | <b>497</b>  | <b>29.8</b> | <b>249</b>  | 89.3 | 4.94 |
| <b>R18 Heart</b>  | 865  | 156  | 347  | 71   | 364  | 19.9  | 161  | 0.97 | 315  | 19.1 | 124  | 151 | 1236 | 57.7 | 67.5 | 55.1 | <b>153</b>  | <b>51.3</b> | <b>15.4</b> | 80.7 | 0.52 |
| <b>R18 Lung</b>   | 1099 | 483  | 1006 | 278  | 656  | 21.1  | 430  | 1.50 | 436  | 18.4 | 288  | 172 | 1384 | 192  | 181  | 91   | <b>391</b>  | <b>136</b>  | <b>7.21</b> | 122  | 5.24 |
| <b>R18 Kidney</b> | 1166 | 668  | 711  | 424  | 849  | 17.7  | 684  | 31.2 | 650  | 18.4 | 457  | 134 | 1199 | 116  | 196  | 219  | <b>503</b>  | <b>262</b>  | <b>9.93</b> | 127  | 1.11 |
| <b>R18 Liver</b>  | 847  | 389  | 581  | 195  | 538  | 8.04  | 323  | 1.14 | 273  | 10.9 | 190  | 100 | 832  | 216  | 117  | 139  | <b>328</b>  | <b>10.1</b> | <b>7.65</b> | 113  | 1.97 |
| <b>R19 Lung</b>   | 1066 | 484  | 1455 | 312  | 809  | 10.76 | 454  | 2.0  | 521  | 26.1 | 317  | 182 | 2021 | 115  | 169  | 234  | <b>169</b>  | <b>233</b>  | <b>70</b>   | 317  | 4.62 |
| <b>R19 Kidney</b> | 790  | 116  | 282  | 89   | 343  | 6.86  | 150  | 1.18 | 334  | 15.8 | 118  | 146 | 1551 | 46.4 | 67.6 | 89.3 | <b>145</b>  | <b>56.3</b> | <b>109</b>  | 69.7 | 0.96 |
| <b>R19 Liver</b>  | 1472 | 541  | 862  | 276  | 689  | 19.1  | 431  | 1.10 | 351  | 15.4 | 272  | 163 | 1214 | 304  | 144  | 101  | <b>451</b>  | <b>15.0</b> | <b>117</b>  | 135  | 3.16 |
| <b>Median</b>     | 954  | 483  | 835  | 276  | 656  | 14.2  | 401  | 1.44 | 392  | 15.3 | 243  | 146 | 1270 | 116  | 144  | 137  | <b>391</b>  | <b>92</b>   | <b>20.3</b> | 131  | 2.62 |

Table S2. Concentrations (in  $\mu\text{M}$ ) of total amino acids (free+proteinic) in the homogenates of the analyzed organs of the rats. See Table 1.

| Rat/Organ         | Ala   | Thr  | Gly   | Val   | Ser  | Sarc | Leu+Ile | GAA   | Asp+Asn | OH-Pro | Pro  | Met  | Glu+Gln | Orn+Cit | Phe  | Tyr  | Lys          | Arg         | hArg          | Trp  | ADMA  |
|-------------------|-------|------|-------|-------|------|------|---------|-------|---------|--------|------|------|---------|---------|------|------|--------------|-------------|---------------|------|-------|
| <b>R1 Lung</b>    | 5574  | 3509 | 4888  | 4390  | 4093 | 1.67 | 7857    | 3.56  | 6073    | 29.24  | 2811 | 909  | 7897    | 88      | 2334 | 1115 | <b>4459</b>  | <b>2391</b> | <b>165.41</b> | 32.9 | 17.91 |
| <b>R1 Kidney</b>  | 5788  | 3870 | 5037  | 4934  | 4711 | 1.83 | 8921    | 22.53 | 6473    | 38.93  | 2909 | 1024 | 8145    | 175     | 2632 | 1422 | <b>4590</b>  | <b>2771</b> | <b>431.73</b> | 38.1 | 2.96  |
| <b>R2 Heart</b>   | 5401  | 3858 | 4941  | 4802  | 4262 | 1.93 | 8608    | 29.52 | 6233    | 43.35  | 3030 | 812  | 7882    | 157     | 2549 | 1388 | <b>4386</b>  | <b>2797</b> | <b>9.48</b>   | 19.4 | 3.24  |
| <b>R2 Lung</b>    | 6494  | 4291 | 5982  | 5284  | 4955 | 2.28 | 9575    | 3.99  | 7122    | 41.36  | 3353 | 1015 | 9459    | 92      | 2762 | 1318 | <b>5299</b>  | <b>2989</b> | <b>6.18</b>   | 32.6 | 20.79 |
| <b>R2 Kidney</b>  | 6720  | 4692 | 5744  | 5285  | 4665 | 1.99 | 10679   | 3.03  | 7743    | 179.08 | 3274 | 1228 | 11443   | 72      | 2916 | 1716 | <b>5665</b>  | <b>3645</b> | <b>10.19</b>  | 27.5 | 5.33  |
| <b>R2 Liver</b>   | 3069  | 2052 | 2933  | 2473  | 2628 | 2.03 | 4447    | 2.67  | 3070    | 16.67  | 1649 | 565  | 4124    | 162     | 1370 | 793  | <b>2358</b>  | <b>1379</b> | <b>4.59</b>   | 39.2 | 6.80  |
| <b>R3 Heart</b>   | 5665  | 3781 | 4585  | 4623  | 4009 | 1.97 | 8788    | 3.99  | 6136    | 45.14  | 2823 | 978  | 8813    | 141     | 2514 | 1224 | <b>4709</b>  | <b>2647</b> | <b>9.55</b>   | 24.8 | 8.51  |
| <b>R3 Lung</b>    | 6705  | 4372 | 6061  | 5325  | 5088 | 1.81 | 9629    | 4.41  | 7670    | 59.80  | 3441 | 1056 | 9512    | 145     | 2859 | 1364 | <b>5439</b>  | <b>3104</b> | <b>7.68</b>   | 19.5 | 21.52 |
| <b>R3 Kidney</b>  | 8338  | 6111 | 7833  | 7463  | 6554 | 1.88 | 13732   | 30.47 | 10446   | 94.53  | 4581 | 1380 | 13162   | 241     | 3975 | 2390 | <b>6862</b>  | <b>4531</b> | <b>9.08</b>   | 32.5 | 5.11  |
| <b>R3 Liver</b>   | 10499 | 7372 | 9505  | 9247  | 7786 | 2.10 | 16549   | 4.88  | 12815   | 21.62  | 5720 | 1657 | 15992   | 414     | 4983 | 2873 | <b>8534</b>  | <b>5368</b> | <b>18.50</b>  | 17.7 | 16.40 |
| <b>R4 Lung</b>    | 8231  | 5296 | 7620  | 6283  | 6011 | 2.13 | 11780   | 4.48  | 9153    | 152.69 | 4159 | 1328 | 12200   | 208     | 3311 | 1804 | <b>6729</b>  | <b>4052</b> | <b>167.92</b> | 34.2 | 34.07 |
| <b>R4 Kidney</b>  | 13195 | 8976 | 10851 | 10634 | 8747 | 2.10 | 20741   | 4.61  | 15765   | 264.12 | 6162 | 2193 | 22508   | 152     | 5680 | 3396 | <b>10970</b> | <b>6998</b> | <b>235.27</b> | 33.5 | 13.18 |
| <b>R4 Liver</b>   | 12756 | 8528 | 11504 | 10829 | 8755 | 2.60 | 19575   | 5.36  | 14973   | 26.34  | 6390 | 1810 | 18185   | 440     | 5797 | 3124 | <b>10571</b> | <b>6307</b> | <b>417.28</b> | 19.2 | 24.33 |
| <b>R5 Lung</b>    | 7653  | 4929 | 7248  | 5905  | 5514 | 1.73 | 10976   | 3.38  | 8155    | 159.57 | 3937 | 1290 | 11064   | 170     | 3041 | 1539 | <b>6042</b>  | <b>3664</b> | <b>0.99</b>   | 18.5 | 28.29 |
| <b>R5 Liver</b>   | 10445 | 6837 | 9143  | 8619  | 7142 | 2.55 | 16016   | 3.83  | 11657   | 26.41  | 5218 | 1498 | 14484   | 420     | 4579 | 2638 | <b>8273</b>  | <b>4948</b> | <b>0.75</b>   | 38.2 | 20.38 |
| <b>R13 Heart</b>  | 10068 | 6725 | 8249  | 7924  | 6530 | 2.16 | 15431   | 4.09  | 11228   | 83.89  | 4523 | 1696 | 15970   | 117     | 4221 | 2279 | <b>8305</b>  | <b>5069</b> | <b>21.54</b>  | 19.4 | 6.77  |
| <b>R13 Lung</b>   | 10938 | 7169 | 9908  | 8795  | 7715 | 1.92 | 16152   | 5.02  | 12867   | 54.97  | 5396 | 1665 | 15758   | 222     | 4673 | 2232 | <b>9036</b>  | <b>4784</b> | <b>16.90</b>  | 18.5 | 33.44 |
| <b>R13 Kidney</b> | 7139  | 4761 | 6156  | 6029  | 5129 | 1.68 | 10925   | 21.52 | 8369    | 47.33  | 3578 | 1176 | 9552    | 153     | 3108 | 1771 | <b>5694</b>  | <b>3395</b> | <b>15.57</b>  | 14.9 | 5.65  |
| <b>R13 Liver</b>  | 11883 | 7964 | 10625 | 10039 | 8284 | 2.12 | 18124   | 4.60  | 13192   | 24.73  | 6069 | 1777 | 17203   | 475     | 5417 | 2908 | <b>9288</b>  | <b>5679</b> | <b>18.62</b>  | 20.0 | 19.02 |
| <b>R14 Heart</b>  | 13752 | 9673 | 11829 | 11222 | 9129 | 2.21 | 22114   | 4.39  | 17188   | 121.67 | 6323 | 2447 | 24443   | 112     | 5989 | 3489 | <b>11873</b> | <b>7500</b> | <b>160.36</b> | 18.1 | 11.57 |
| <b>R14 Lung</b>   | 8946  | 5688 | 9303  | 7116  | 6401 | 1.60 | 12848   | 4.96  | 10068   | 398.40 | 4707 | 1337 | 12486   | 81      | 3630 | 1831 | <b>6977</b>  | <b>4349</b> | <b>54.02</b>  | 20.2 | 28.21 |
| <b>R14 Kidney</b> | 11314 | 7826 | 10271 | 9632  | 8596 | 1.91 | 17448   | 35.64 | 13999   | 122.46 | 5950 | 1778 | 16807   | 286     | 4927 | 2932 | <b>9113</b>  | <b>5996</b> | <b>194.81</b> | 18.2 | 6.93  |
| <b>R14 Liver</b>  | 9239  | 6531 | 8850  | 8272  | 7005 | 2.04 | 14908   | 4.16  | 11073   | 16.65  | 5006 | 1583 | 14200   | 344     | 4376 | 2289 | <b>7634</b>  | <b>4677</b> | <b>126.64</b> | 18.0 | 16.59 |

|                   |       |      |       |       |      |      |       |       |       |         |      |      |       |     |      |      |              |             |               |      |       |
|-------------------|-------|------|-------|-------|------|------|-------|-------|-------|---------|------|------|-------|-----|------|------|--------------|-------------|---------------|------|-------|
| <b>R17 Heart</b>  | 11909 | 7849 | 9876  | 9429  | 7897 | 2.01 | 18367 | 3.95  | 13403 | 268.89  | 5361 | 2075 | 18821 | 96  | 5012 | 2859 | <b>9755</b>  | <b>5925</b> | <b>121.30</b> | 22.9 | 10.92 |
| <b>R17 Lung</b>   | 14271 | 8635 | 16720 | 11222 | 9741 | 1.82 | 20255 | 5.95  | 15399 | 1109.77 | 7668 | 2050 | 19071 | 145 | 5642 | 2860 | <b>10451</b> | <b>6805</b> | <b>163.45</b> | 19.1 | 38.02 |
| <b>R17 Kidney</b> | 11852 | 7946 | 9963  | 9983  | 8914 | 1.75 | 18117 | 36.27 | 14468 | 71.64   | 6168 | 1804 | 16668 | 292 | 5192 | 2940 | <b>9457</b>  | <b>5866</b> | <b>379.78</b> | 16.5 | 6.53  |
| <b>R17 Liver</b>  | 11149 | 7320 | 9959  | 9093  | 7766 | 2.24 | 17026 | 4.13  | 12600 | 26.34   | 5744 | 1824 | 16221 | 478 | 4963 | 2752 | <b>8696</b>  | <b>5531</b> | <b>264.14</b> | 17.9 | 20.65 |
| <b>R18 Heart</b>  | 9324  | 6375 | 7674  | 7095  | 6173 | 2.54 | 14318 | 4.38  | 10212 | 149.86  | 4258 | 1705 | 15381 | 114 | 3849 | 2367 | <b>7786</b>  | <b>4986</b> | <b>15.02</b>  | 28.7 | 7.64  |
| <b>R18 Lung</b>   | 7596  | 5066 | 6785  | 5914  | 5687 | 2.02 | 11226 | 3.68  | 8856  | 44.25   | 3936 | 1253 | 11339 | 262 | 3222 | 1670 | <b>6272</b>  | <b>3623</b> | <b>6.88</b>   | 22.5 | 27.06 |
| <b>R18 Kidney</b> | 6329  | 4300 | 5553  | 5138  | 4705 | 2.15 | 9719  | 19.15 | 6955  | 37.97   | 3260 | 988  | 8824  | 173 | 2826 | 1575 | <b>5053</b>  | <b>3136</b> | <b>10.67</b>  | 22.4 | 5.40  |
| <b>R18 Liver</b>  | 6631  | 4369 | 6291  | 5344  | 4696 | 2.23 | 9655  | 2.89  | 7006  | 18.84   | 3342 | 1086 | 9322  | 298 | 2917 | 1578 | <b>5262</b>  | <b>3115</b> | <b>7.43</b>   | 35.4 | 14.52 |
| <b>R19 Lung</b>   | 7788  | 5001 | 7491  | 6072  | 6017 | 2.03 | 11494 | 3.30  | 8976  | 45.75   | 3799 | 1279 | 11658 | 163 | 3282 | 1525 | <b>6385</b>  | <b>3617</b> | <b>56.16</b>  | 38.4 | 26.34 |
| <b>R19 Kidney</b> | 12180 | 8255 | 10003 | 9524  | 8102 | 2.17 | 19308 | 5.05  | 13936 | 142.69  | 5550 | 2087 | 20733 | 139 | 5184 | 3112 | <b>10310</b> | <b>6594</b> | <b>126.09</b> | 36.1 | 11.62 |
| <b>R19 Liver</b>  | 12908 | 7578 | 11540 | 9839  | 8830 | 2.37 | 18071 | 5.09  | 13994 | 29.15   | 5916 | 1765 | 17754 | 453 | 5341 | 2816 | <b>9897</b>  | <b>5863</b> | <b>130.67</b> | 59.5 | 24.42 |
| <b>Median</b>     | 9093  | 6243 | 8041  | 7290  | 6466 | 2.03 | 14025 | 4.45  | 10329 | 46.5    | 4552 | 1439 | 13681 | 167 | 3912 | 2256 | <b>7306</b>  | <b>4604</b> | <b>20.1</b>   | 22.5 | 15.5  |

Table S3. Mean concentrations (in  $\mu\text{M}$ ) of free and total amino acids in the homogenates of the analyzed organs of the rats. See Table 1.

|               | Ala  | Thr  | Gly  | Val  | Ser  | Sarc | Leu+Ile | GAA         | Asp+Asn | OH-Pro      | Pro  | Met  | Glu+Gln | Orn+Cit    | Phe  | Tyr  | Lys  | Arg  | hArg       | Trp | ADMA        |
|---------------|------|------|------|------|------|------|---------|-------------|---------|-------------|------|------|---------|------------|------|------|------|------|------------|-----|-------------|
| <b>FREE</b>   |      |      |      |      |      |      |         |             |         |             |      |      |         |            |      |      |      |      |            |     |             |
| <b>Lung</b>   | 869  | 384  | 1019 | 223  | 612  | 13.1 | 347     | 1.5         | 413     | 17.0        | 231  | 147  | 1360    | 98         | 138  | 127  | 314  | 172  | 73         | 150 | <b>3.9</b>  |
| <b>Kidney</b> | 1351 | 708  | 853  | 558  | 790  | 12.6 | 805     | <b>34.6</b> | 878     | <b>24.6</b> | 524  | 186  | 1789    | 114        | 244  | 241  | 510  | 303  | <b>165</b> | 137 | 1.5         |
| <b>Heart</b>  | 954  | 442  | 571  | 371  | 585  | 14.6 | 521     | <b>20.8</b> | 588     | 17.2        | 295  | 173  | 1556    | 76         | 160  | 144  | 346  | 212  | 54         | 120 | 1.1         |
| <b>Liver</b>  | 1249 | 515  | 789  | 282  | 716  | 21.0 | 461     | 1.4         | 390     | 11.4        | 245  | 128  | 1178    | <b>272</b> | 155  | 141  | 438  | 28   | <b>108</b> | 110 | <b>3.3</b>  |
| <b>TOTAL</b>  |      |      |      |      |      |      |         |             |         |             |      |      |         |            |      |      |      |      |            |     |             |
|               | Ala  | Thr  | Gly  | Val  | Ser  | Sarc | Leu+Ile | GAA         | Asp+Asn | OH-Pro      | Pro  | Met  | Glu+Gln | Orn+Cit    | Phe  | Tyr  | Lys  | Arg  | hArg       | Trp | ADMA        |
| <b>Lung</b>   | 8420 | 5396 | 8201 | 6631 | 6122 | 1.9  | 12179   | 4.3         | 9434    | <b>210</b>  | 4321 | 1318 | 12044   | 158        | 3476 | 1726 | 6709 | 3938 | 65         | 26  | <b>27.6</b> |
| <b>Kidney</b> | 9206 | 6304 | 7935 | 7625 | 6680 | 1.9  | 14399   | <b>19.8</b> | 10906   | 111         | 4604 | 1518 | 14205   | 187        | 4049 | 2362 | 7524 | 4770 | <b>157</b> | 27  | 7.0         |
| <b>Heart</b>  | 9353 | 6377 | 7859 | 7516 | 6333 | 2.1  | 14604   | 8.4         | 10733   | 119         | 4386 | 1619 | 15218   | 123        | 4022 | 2268 | 7802 | 4821 | 56         | 22  | 8.1         |
| <b>Liver</b>  | 9842 | 6506 | 8928 | 8195 | 6988 | 2.3  | 14930   | 4.2         | 11153   | 23          | 5006 | 1507 | 14165   | <b>387</b> | 4416 | 2419 | 7835 | 4763 | <b>110</b> | 29  | <b>18.1</b> |

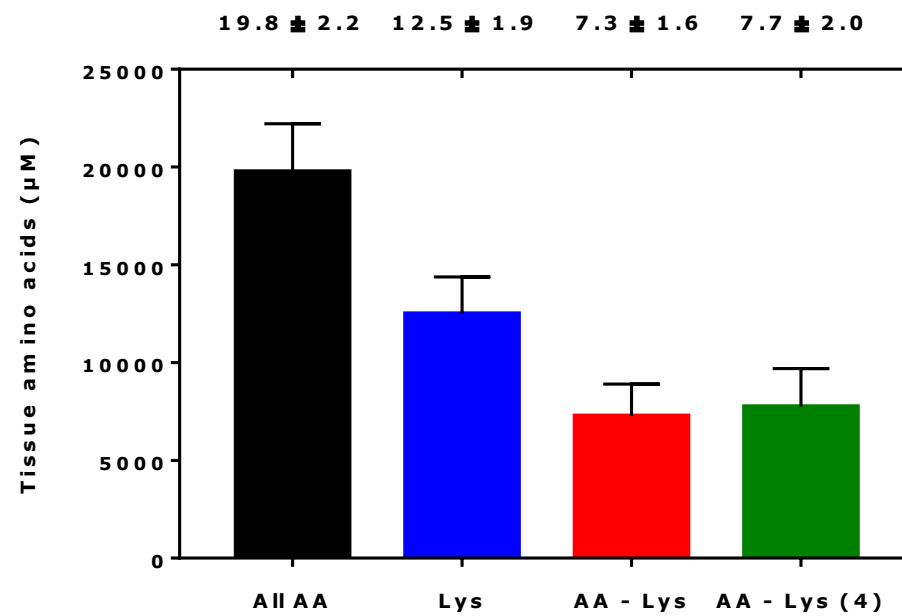

Figure S1. Concentration of the sum of all amino acids (All AA), of lysine (Lys), of all amino acids except for Lys (AA-Lys) in all organs available, and of all amino acids except for Lys in the four organs of six rats (AA-Lys (4)). See also Table S1.

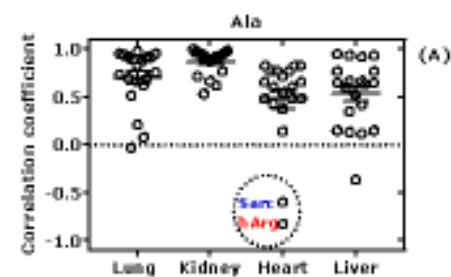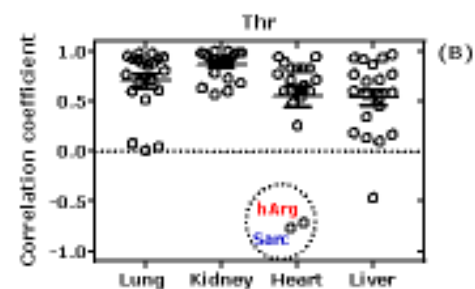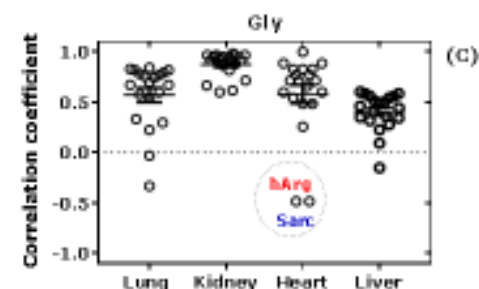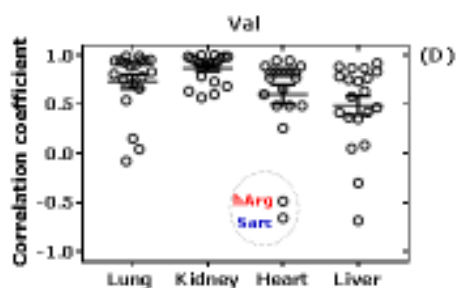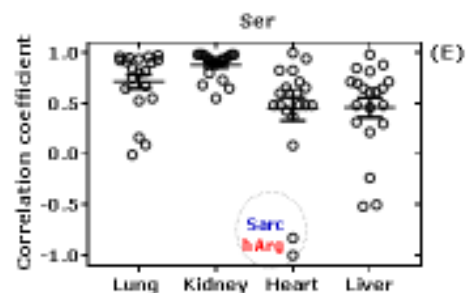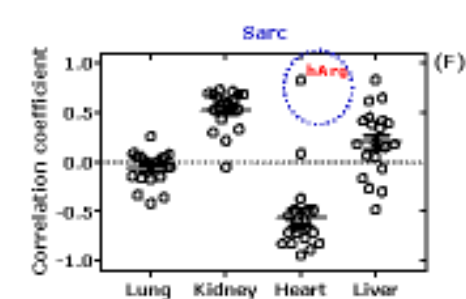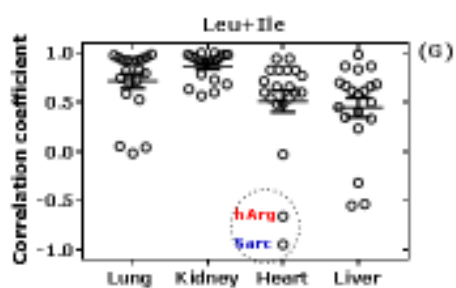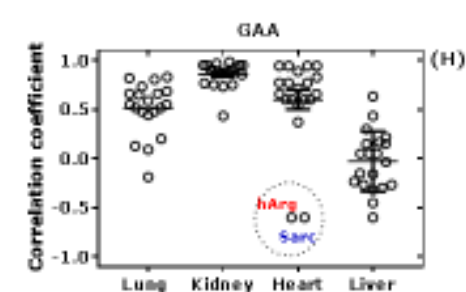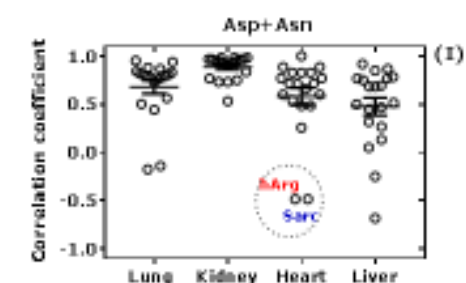

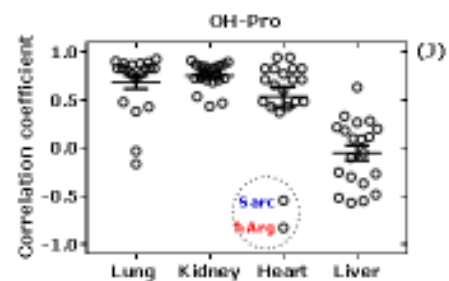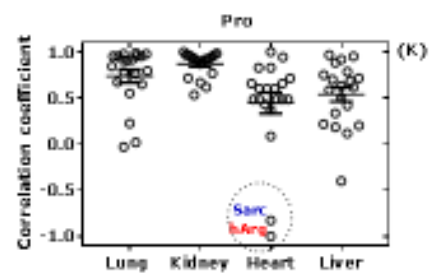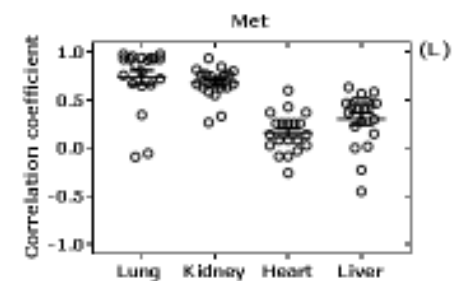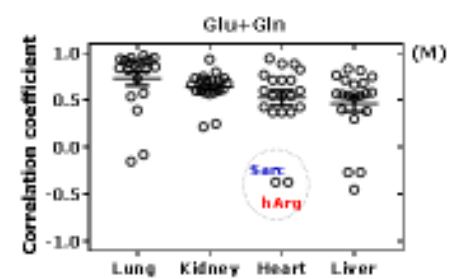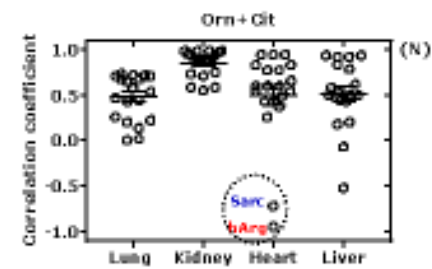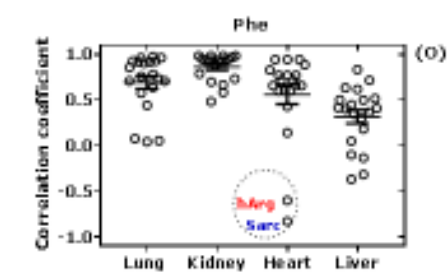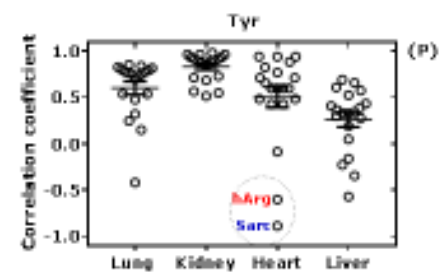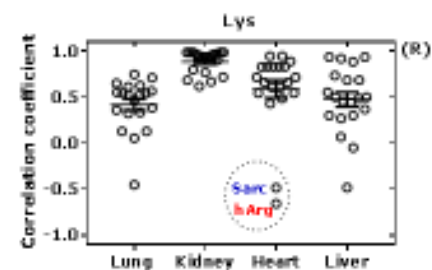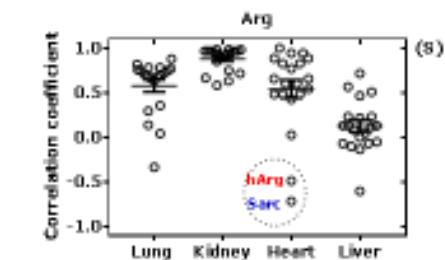



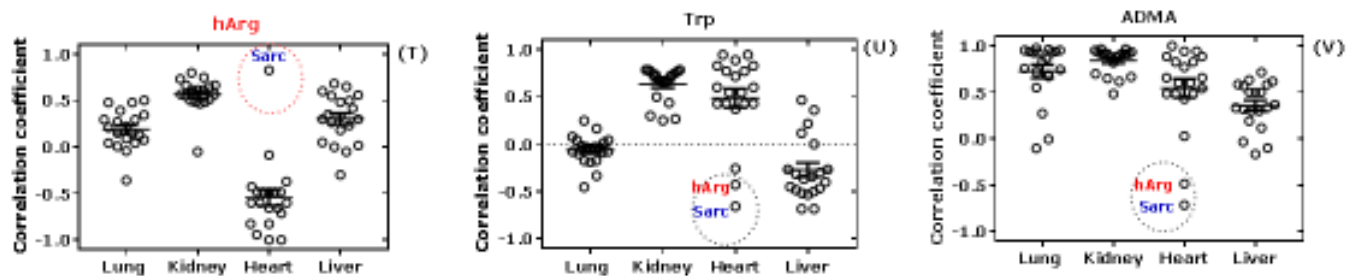

Figure S2. Spearman correlation coefficients for free tissue amino acids in lung, kidney, heart and liver of the study rats. The data points for Sarc and hArg are encircled and given in blue and red, respectively. Explanation of the amino acids: Ala, alanine; Thr, threonine; Gly, Glycine; Val, Valine; Ser, Serine; Sarc, sarcosine; Leu+Ile, leucine+isoleucine; GAA, Guanidinoacetate; Asp+Asn, aspartate+asparagine; OH-hydroxyproline; Pro, proline; Met, methionine; Glu+Gln, glutamate+glutamine; Orn+Cit, ornithine+citrulline; Phe, phenylalanine; Tyr, tyrosine; Lys, lysine; Arg, arginine; hArg, homoarginine; Trp, tryptophane; ADMA, asymmetric dimethylarginine.

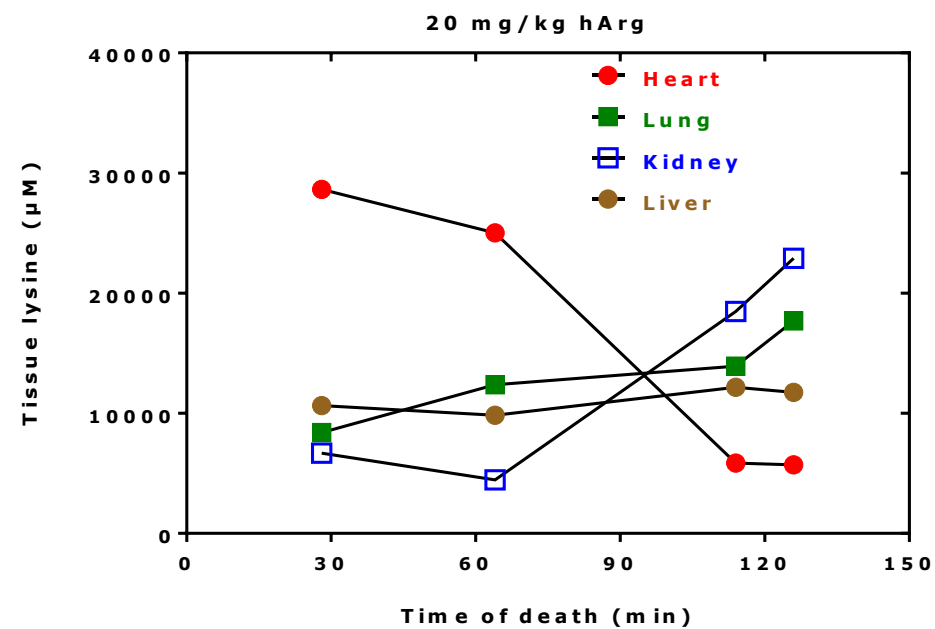

Figure S3. Concentration of free Lys in homogenate samples of four rats (#3, #2, #18, #13) administered with hArg (t=0 min) and isoprenaline (t = 15 min) measured at the time of death. See also Table S1.
